# Supplementary material for: Insight into a high temperature selective oxidation of HP40 alloy under a H2–H2O environment
Source: Royal Society of Chemistry journal article supplement (doi:10.1039/c6ra25933b), 2017-01-01
Supplement: c6ra25933b1.pdf [file c6ra25933b1.pdf]

# Insight into High Temperature Selective Oxidation of HP40 Alloy under H<sub>2</sub>-H<sub>2</sub>O Environment

Binbin Bao, Jinglei Liu\*, Bo Liu, Kai Zhang, Zhaorong Jin and Hong Xu

State-Key Laboratory of Chemical Engineering, School of Mechanical and Power

Engineering, East China University of Science and Technology, Shanghai, 200237, China

Tel: +86 021 64251315; Fax: +86 021 64253810

Email address: ljlei@ecust.edu.cn

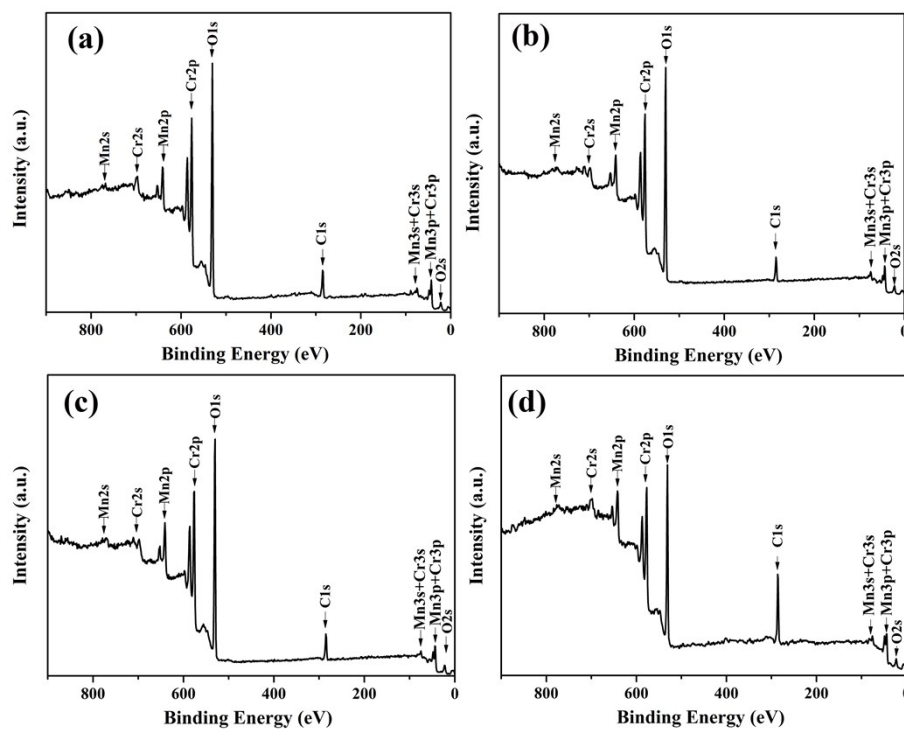

Fig. S1 Survey XPS spectra of oxide scales formed after various oxidation times: (a) 0.2 h; (b) 2 h; (c) 10 h; (d) 20 h.

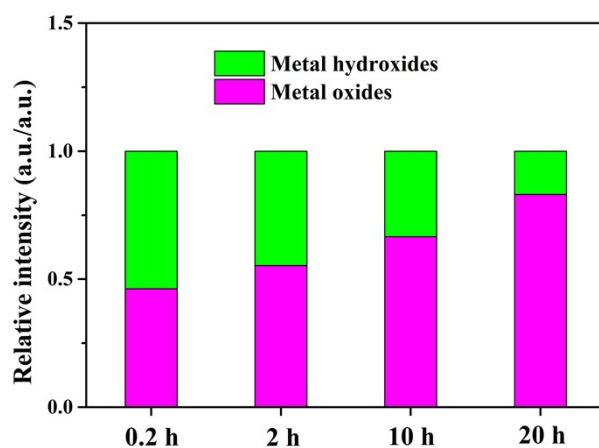

Fig. S2 Relative intensities of O species on oxide scales formed after various oxidation times: (a) 0.2 h; (b) 2 h; (c) 10 h; (d) 20 h.

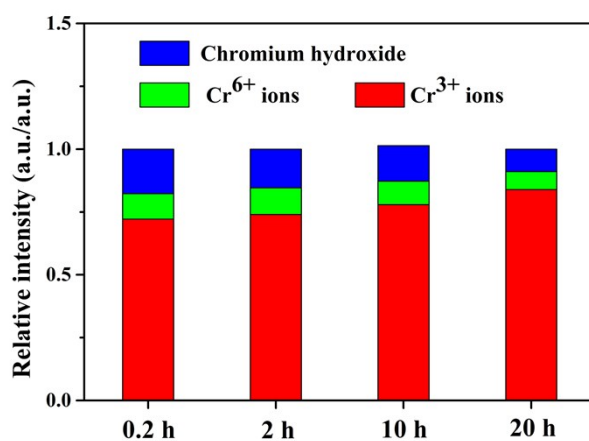

Fig. S3 Relative intensities of Cr species on oxide scales formed after various oxidation times: (a) 0.2 h; (b) 2 h; (c) 10 h; (d) 20 h.

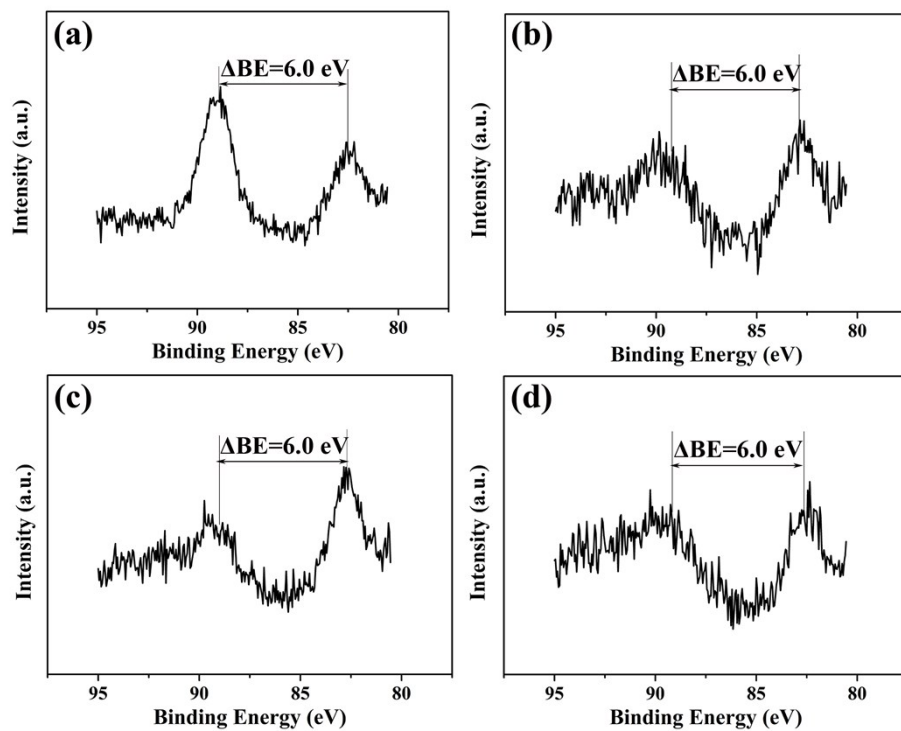

Fig. S4 XPS spectra of Mn 3S regions for oxide scales formed after various oxidation times: (a) 0.2 h; (b) 2 h; (c) 10 h; (d) 20 h.
